# Supplementary material for: State Laws Matter When It Comes to District Policymaking Relative to the Whole School, Whole Community, Whole Child Framework
Source: PubMed Central journal article supplement (PMC7702124; doi:10.1111/josh.12959), 2020-11-12
Supplement: JOSH-90-907-s002.pdf [file JOSH-90-907-s002.pdf]

**Appendix S2. Predicted Mean District Policy Score and Change in Score by Domain Associated with District-Weighted Mean and Comprehensive State Law Scores**

| Domain (# of Items in Domain)                      | State Score           | Unadjusted Models        |                                       | Adjusted Models          |                                       |
|----------------------------------------------------|-----------------------|--------------------------|---------------------------------------|--------------------------|---------------------------------------|
|                                                    |                       | Predicted District Score | %age point $\Delta$ in District Score | Predicted District Score | %age point $\Delta$ in District Score |
| Community Involvement (3)                          | Mean 73.8<br>Full 100 | 76.4<br>74.2             | -2                                    | 76.0<br>72.6             | <b>-3</b>                             |
| Counseling, Psychological, and Social Services (8) | Mean 70.5<br>Full 100 | 49.1<br>36.1             | <b>-13</b>                            | 49.3<br>42.6             | <b>-7</b>                             |
| Employee Wellness (5)                              | Mean 15.5<br>Full 100 | 17.3<br>29.3             | 12                                    | 17.6<br>18.6             | 1                                     |
| Family Engagement (4)                              | Mean 60.5<br>Full 100 | 53.5<br>54.6             | 1                                     | 53.2<br>69.3             | <b>16</b>                             |
| Health Education (10)                              | Mean 69.9<br>Full 100 | 56.5<br>44.7             | <b>-12</b>                            | 55.9<br>33.7             | <b>-22</b>                            |
| Health Services (10)                               | Mean 77.6<br>Full 100 | 52.9<br>65.4             | <b>13</b>                             | 52.6<br>63.9             | <b>11</b>                             |
| Nutrition Environment and Services (6)             | Mean 32.0<br>Full 100 | 49.8<br>56.8             | 7                                     | 50.3<br>47.1             | -3                                    |
| Physical Activity and Education (7)                | Mean 49.4<br>Full 100 | 56.6<br>102.2            | <b>46</b>                             | 56.8<br>85.8             | <b>29</b>                             |
| Physical Environment (12)                          | Mean 80.6<br>Full 100 | 62.1<br>63.5             | 1                                     | 61.5<br>61.6             | 0                                     |
| Social and Emotional Climate (14)                  | Mean 66.8<br>Full 100 | 50.8<br>61.8             | <b>11</b>                             | 50.5<br>61.9             | <b>11</b>                             |
| <i>Overall (79)</i>                                | Mean 63.5<br>Full 100 | 52.8<br>57.0             | <b>4</b>                              | 52.6<br>62.0             | <b>9</b>                              |

Notes: Items in **bold** reflect statistically significant differences at the p<.05 threshold or lower based on the regression models presented in Table 3.
